# Supplementary material for: Myosin 7b is a regulatory long noncoding RNA (lncMYH7b) in the human heart
Source: PubMed Central journal article supplement — J Biol Chem. 2021 Apr 22;296:100694. doi: 10.1016/j.jbc.2021.100694 (PMC8141895; doi:10.1016/j.jbc.2021.100694), 2021-04-22
Supplement: mmc1.pdf [file mmc1.pdf]

# SUPPORTING INFORMATION

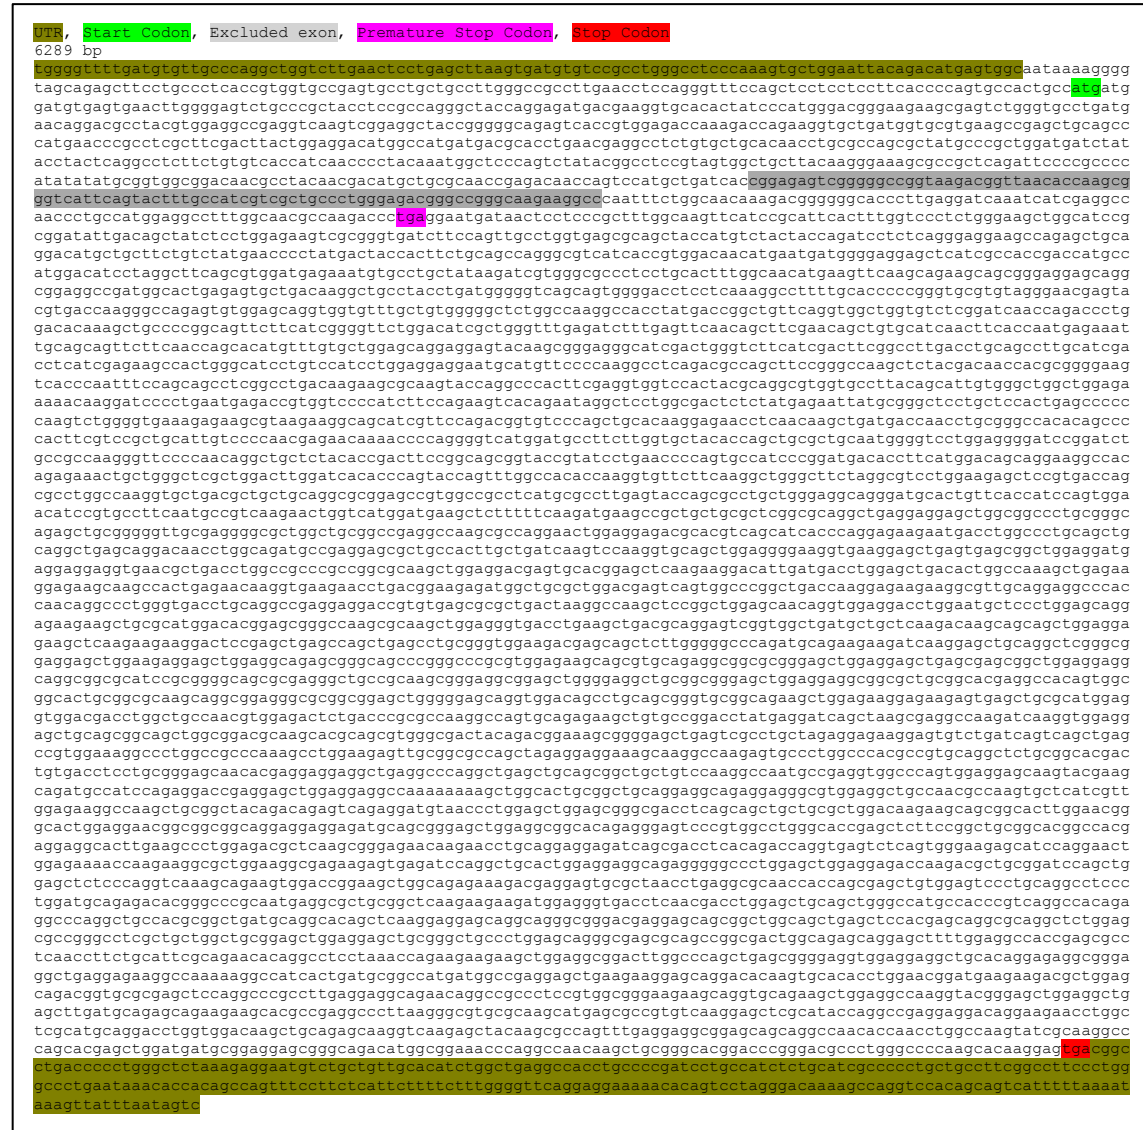

**Figure S1. Sequence originating from the *MYH7b* gene locus.** Full sequence of the RNA transcribed from the *MYH7b* locus, with important features like the skipped exon annotated.

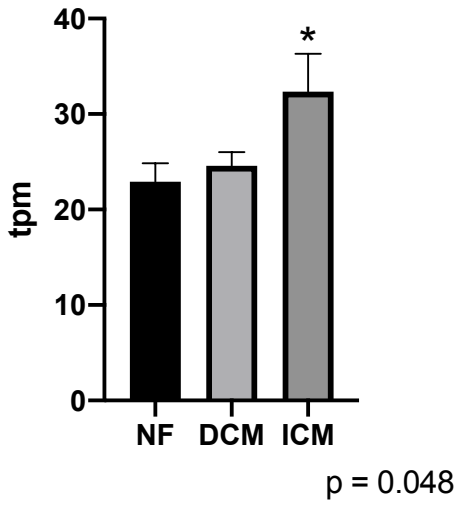

**Figure S2. MYH7b increases in heart disease.** Analysis of dataset GSE116250 shows a modest increase in MYH7b tpm in DCM hearts and a significant increase in ICM hearts.

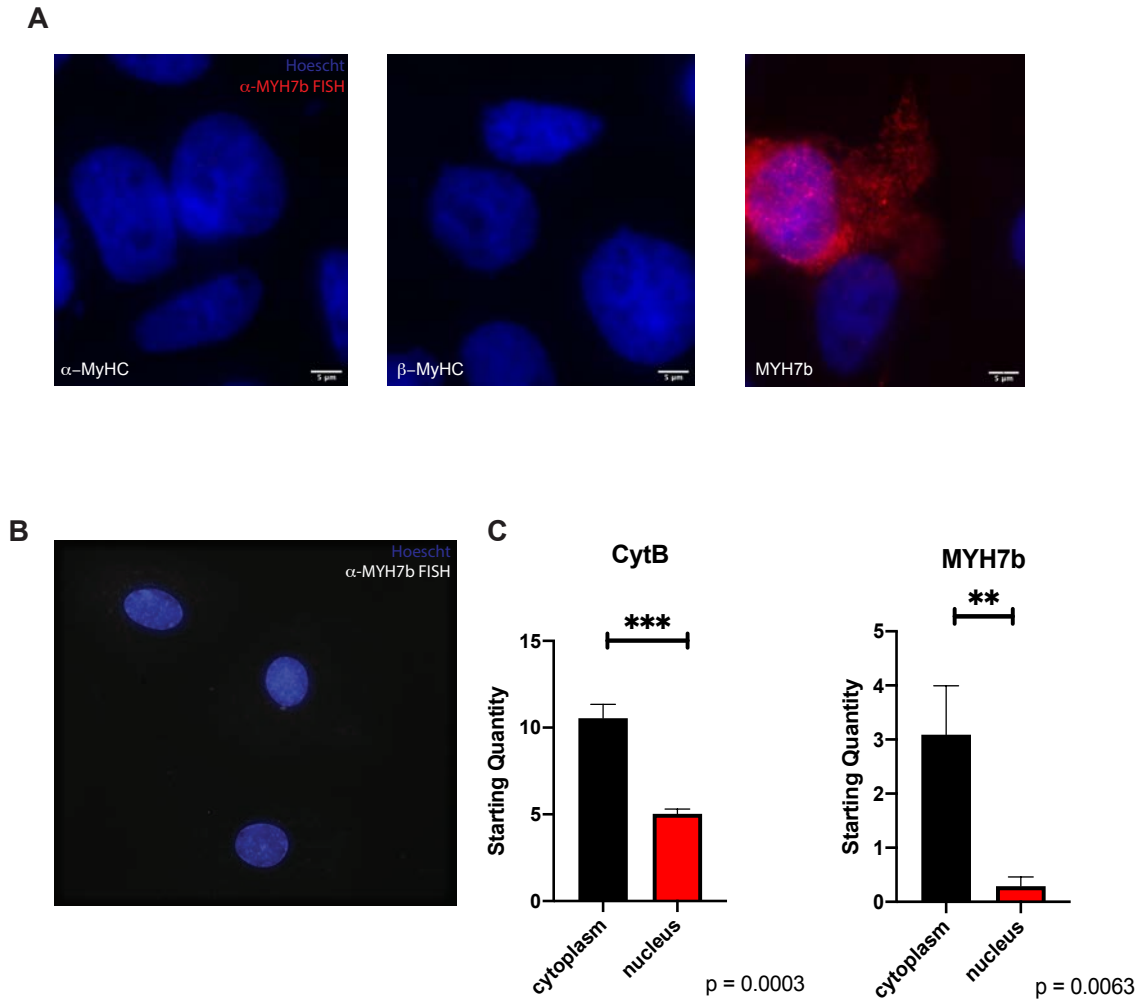

**Figure S3.  $\alpha$ -MYH7b FISH probes are specific to MYH7b and reflect biochemical fractionation data.** **A)** Cos7 cells were transfected with the cDNA of  $\alpha$ -MyHC,  $\beta$ -MyHC, and MYH7b, individually, then subjected to FISH using probes against MYH7b. There was no cross-reaction with either  $\alpha$ -MyHC or  $\beta$ -MyHC. **B)** There is no FISH signal in hiPS-CMs treated with the MYH7b ASO. **C)** qPCR done on a biochemical fractionation of hiPS-CMs shows strong cytoplasmic localization of MYH7b RNA, agreeing with the FISH data.

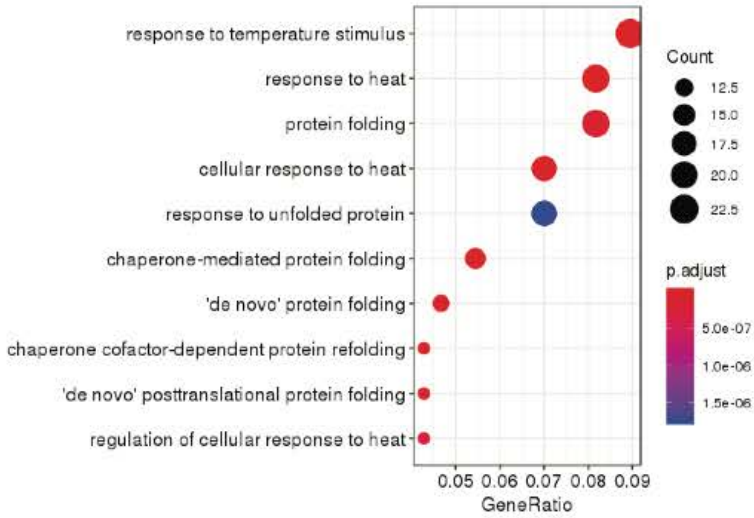

**Figure S4. Pathways associated with MYH7b<sub>sp</sub> expression.** GO analysis of RNA-seq in iPS-CMs infected with adenovirus expressing MYH7b<sub>sp</sub> shows pathways associated with adenoviral infection and folding of a foreign peptide. This indicates that MYH7b<sub>sp</sub> is not typically expressed in cardiomyocytes.

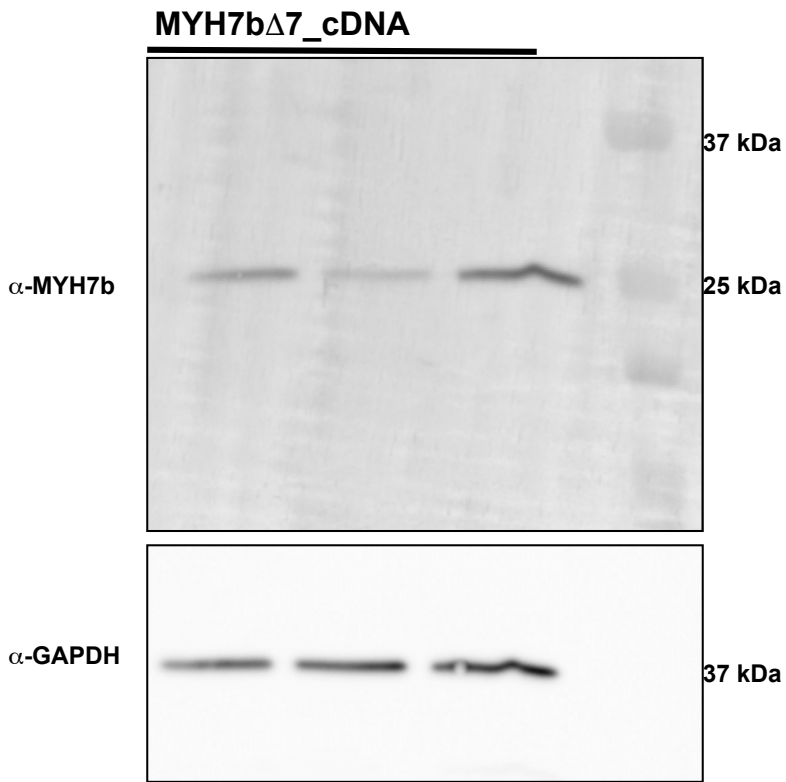

**Figure S5. A MYH7b exon-skipped cDNA (MYH7b $\Delta$ 7\_cDNA) produces MYH7b<sub>sp</sub>.** Western blotting reveals that overexpression of MYH7b $\Delta$ 7\_cDNA via adenovirus infection causes translation of MYH7b<sub>sp</sub>, which is not normally detectable in human hearts. We have also shown MYH7b<sub>sp</sub> to not be relevant to the  $\beta$ -MyHC/ $\alpha$ -MyHC ratio, and therefore moved on to a loss-of-function approach.

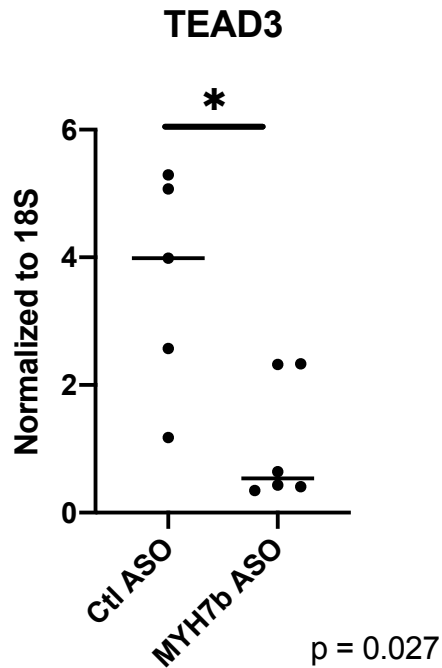

**Figure S6. TEAD3 RNA is significantly down by qPCR.** Changes in TEAD3 expression were confirmed across three differentiations by SYBR Green qPCR.

| Type       | Name  | Sequence       |
|------------|-------|----------------|
| anti-MYH7b | 12150 | GCTTCTCTGCACTG |

**Table S1. Sequence of anti-MYH7b ASO.**

| Sequence              | Position | GC      |           |
|-----------------------|----------|---------|-----------|
|                       |          | Content | # Matches |
| cttttgtccctaggactgtg  | 6128     | 50.00%  | 0         |
| cgtctttgttgccagaaatt  | 747      | 40.00%  | 2         |
| gatgcagagatggcaggatc  | 6016     | 55.00%  | 3         |
| cagatgtgcaacagcagaca  | 5978     | 50.00%  | 4         |
| aagttcactcacatccatca  | 220      | 40.00%  | 6         |
| cccgcataatttcatagag   | 1991     | 45.00%  | 7         |
| ttcttacgcttctctttcac  | 2042     | 40.00%  | 8         |
| ttgtcttgagcagcatcagc  | 3341     | 50.00%  | 8         |
| gtacttgcgcttctgtcag   | 1833     | 50.00%  | 8         |
| atgggatagtgtgcaccttc  | 284      | 50.00%  | 9         |
| actgagactcacctggctctg | 4680     | 55.00%  | 9         |

|                       |      |        |    |
|-----------------------|------|--------|----|
| ctccagtaagtcgaagcgag  | 460  | 55.00% | 11 |
| cttatagcagggcacatttct | 1164 | 40.00% | 11 |
| acaatgctgtaaggcaccac  | 1886 | 50.00% | 11 |
| tgtagcaccaagaaggcatc  | 2195 | 50.00% | 11 |
| tggtagtcaaggcgcatgag  | 2528 | 55.00% | 11 |
| ttagctgatcctcataggtc  | 3892 | 45.00% | 11 |
| tgtaagcagccactacggag  | 623  | 55.00% | 12 |
| tggtagtagacatggtagct  | 974  | 45.00% | 12 |
| ggttcatagacagaagcagc  | 1030 | 50.00% | 12 |
| tgacttctggaagatgggga  | 1950 | 50.00% | 12 |
| ctgtccatgaagggtgtcatc | 2336 | 50.00% | 12 |
| ttacatcctctgactctgtc  | 4408 | 45.00% | 12 |
| tatcattcctcagggctctg  | 829  | 45.00% | 13 |
| ccagagggaccaaagtgaat  | 878  | 50.00% | 13 |
| caggcaactggaagatcacc  | 946  | 55.00% | 13 |
| catcattcatgttgtccacg  | 1087 | 45.00% | 13 |
| tgaagcctaggatgtccatg  | 1135 | 50.00% | 13 |
| gtctggttgatccgagacac  | 1448 | 55.00% | 13 |
| gctggaaattgggtgacttc  | 1804 | 50.00% | 13 |
| actgatcagcaagtggcag   | 2854 | 50.00% | 13 |
| agctgactgatcagacactc  | 4025 | 50.00% | 13 |
| ttctggtttctccagttc    | 4715 | 40.00% | 13 |
| ctggatctcactcttctcgc  | 4746 | 55.00% | 13 |
| ccaggagatagctgtcaata  | 916  | 45.00% | 14 |
| acaatgcagcggacgaagtg  | 2144 | 55.00% | 14 |
| cggtcaggtgcgtcatcatg  | 488  | 55.00% | 14 |
| tcttccaggacgcctagaag  | 2447 | 55.00% | 14 |
| tatagactgggagccatttg  | 599  | 45.00% | 15 |
| tatatatggggcggggaatc  | 660  | 50.00% | 15 |
| tagtggaccacctcgaagtg  | 1859 | 55.00% | 15 |
| ggacaccgtctggaacgatg  | 2067 | 60.00% | 15 |

|                       |      |        |    |
|-----------------------|------|--------|----|
| atgttccactggatgggtgaa | 2576 | 45.00% | 15 |
| gttcttgacggcattgaagg  | 2601 | 50.00% | 15 |
| atggcatctgcttcgtactt  | 4262 | 45.00% | 15 |
| ctgcgaatgcagaagggtga  | 5280 | 50.00% | 15 |
| ttcttctgctctgcatcaag  | 5618 | 45.00% | 15 |
| caaactggcgctttagctc   | 5770 | 55.00% | 15 |
| taggtatagatcatccagcg  | 546  | 45.00% | 16 |
| cagaaccccgatgaagaact  | 1491 | 50.00% | 16 |
| tcaaggccgaagtcgatgaa  | 1658 | 50.00% | 16 |
| cgtaggtgtcgttagagcttg | 1780 | 55.00% | 16 |
| cggaagtcggtgtagagcag  | 2279 | 60.00% | 16 |
| atgtcgtttagggcgttgtc  | 690  | 50.00% | 16 |
| acggtctcattcaggggatc  | 1928 | 55.00% | 16 |
| tatgagagctccttgacacg  | 5678 | 55.00% | 16 |

Table S2. Sequences of the MYH7b FISH probes.

| Gene  | Forward Primer         | Reverse Primer          |
|-------|------------------------|-------------------------|
| 18S   | GAATTCCCAGTAAGTGGGGG   | GGGCAGGGACTTAATCAACG    |
| MYH7b | CCATGATGACGCACCTGAA    | AGAAGAGGCCTGAGTAGGTATAG |
| MYH7  | GACCTCAAGAAGGATGTCTTCG | GGTCACTGTCTTGCCATACTC   |
| CytB  | CCTCCACCCTTACTACACAATC | CCTAGGAGGTCTGGTGAGAATA  |
| TEAD3 | GATGTGCGCCAGATCTATGA   | CCCAGAACTTGACAAGGAAGA   |

Table S3. qPCR primer sequences.
